# Supplementary material for: Impulsivity is associated with suicide attempt in mood disorders with complex moderation by diagnosis and subjective social status
Source: Research Square preprint supplement (doi:10.21203/rs.3.rs-8970654/v1), 2026-04-28
Supplement: Supplementary file 1 [file 9053c9372ad75b6f1eaeed66.docx]

**Supplemental Table 1.** Demographics of the total sample and BD/MDD groups.

|  | *Bipolar Disorder* | *Major Depressive Disorder* | *p-value* | *Total sample* |
| --- | --- | --- | --- | --- |
| *Number* | 74 | 79 |  | 154 |
| *Age (M ± DS)* | 40.6 ± 13.8 | 35.2 ± 14.7 | 0.01 | 37.8 ± 14.5 |
| *MADRS (M ± DS)* | 13.8 ± 9.3 | 15.2 ± 10.1 | 0.37 | 14.5 ± 9.6 |
| *YMRS (M ± DS)* | 6.7 ± 7.4 | 3.8 ± 4.7 | 0.004 | 5.2 ± 6.3 |
| *ACE (M ± DS)* | 3.6 ± 2.3 | 2.9 ± 2.4 | 0.05 | 3.22 ± 2.4 |
| *SES (M ± DS)* | 5 ± 1.8 | 5.6 ± 1.4 | 0.02 | 5.33 ± 1.6 |
| *Education (M ± DS)* | 15.1 ± 2.2 | 15.5 ± 2.2 | 0.27 | 15.3 ± 2.2 |
| *Sex (M/F)* | 23/51 | 20/59 | 0.57 | 43/110 |
| *Suicide attempt (yes/no)* | 40/34 | 26/53 | 0.01 | 66/87 |

***MADRS*** *= Montgomery Asberg Depression Rating Scale;* ***YMRS*** *= Young Mania Rating Scale;* ***ACE*** *= Adverse Child Experiences;* ***SSS*** *= Subjective Social Status.*

**Supplemental Table 2.** Comparison of S-UPPS-P total score and subscales between suicide attempters and non-attempters, **Tier 2 Analysis**.

| *Model Terms* | | | | | | | | | | | |
| --- | --- | --- | --- | --- | --- | --- | --- | --- | --- | --- | --- |
| S-UPPS-P | *Intercept* |  | *Impulsivity* |  | *Age* |  | *Sex* |  | *SSS* |  |
| *Β**  *(SE)* | *p-value* | *β **  *(SE)* | *p-value* | *β **  *(SE)* | *p-value* | *β **  *(SE)* | *p-value* | *β **  *(SE)* | *p-value* |
| ***Total Score*** | -1.17  *(1.28)* | 0.35 | 0.04  *(0.02)* | 0.05 | 0.02  *(0.01)* | 0.08 | -0.06  *(0.38)* | 0.87 | -0.30  *(0.11)* | 0.008** |
| ***Negative Urgency*** | -1.27  *(1.06)* | 0.23 | 0.17  *(0.06)* | 0.005** | 0.01  *(0.01)* | 0.11 | 0.01  *(0.39)* | 0.98 | -0.29  *(0.11)* | 0.01** |
| ***Lack of Perseverance*** | 1.82  *(0.99)* | 0.06 | -0.10  *(0.08)* | 0.18 | 0.02  *(0.01)* | 0.13 | -0.12  *(0.38)* | 0.75 | -0.36  *(0.11)* | 0.001** |
| ***Lack of Premeditation*** | 1.19  *(1.08)* | 0.26 | -0.03  *(0.08)* | 0.72 | 0.01  *(0.01)* | 0.12 | -0.06  *(0.38)* | 0.86 | -0.35  *(0.11)* | 0.001** |
| ***Sensation Seeking*** | 0.63  *(0.96)* | 0.51 | 0.02  *(0.05)* | 0.67 | 0.02  *(0.01)* | 0.11 | -0.08  *(0.39)* | 0.82 | -0.34  *(0.11)* | 0.001** |
| ***Positive Urgency*** | -0.43  *(0.90)* | 0.63 | 0.13  *(0.05)* | 0.01** | 0.02  *(0.01)* | 0.11 | -0.07  *(0.38)* | 0.85 | -0.30  *(0.11)* | 0.007** |

**All Β coefficients represent unstandardized estimates, reflecting the change in log-odds per one-unit increase in the predictor.*

***Statistically significant model parameters (p<0.05)*

***SE*** *= Standard Error; SSS = Subjective Social Status;* ***S-UPPS-P*** *= Short UPPS-P Impulsive Behavior Scale.*

**Supplemental Table 3.** Comparison of S-UPPS-P total score and subscales between suicide attempters and non-attempters, Tier 3 Analysis.

| ***S-UPPS-P*** | ***Intercept*** | | ***Impulsivity*** | | ***Age*** | | ***Sex*** | | ***SSS*** | | ***Diagnosis*** | | ***Interaction 1 (impulsivity x SSS)*** | | ***Interaction 2 (impulsivity x Diagnosis)*** | | ***Interaction 3 (SSS x Diagnosis)*** | | | | ***Interaction 4***  ***(impulsivity x SSS x Diagnosis)*** | |
| --- | --- | --- | --- | --- | --- | --- | --- | --- | --- | --- | --- | --- | --- | --- | --- | --- | --- | --- | --- | --- | --- | --- |
| *Β* (SE)* | *p-value* | *Β* (SE)* | *p-value* | *Β* (SE)* | *p-value* | *Β* (SE)* | *p-value* | *Β* (SE)* | *p-value* | *Β*  (SE)* | *p-value* | *Β*  (SE)* | *p-value* | *Β*  (SE)* | *p-value* | *Β*  (SE)* | *p-value* | | *Β**  *(SE)* | | *p-value* |
| ***Total Score*** | 9.62  (6.07) | 0.11 | - 0.22  (0.14) | 0.12 | 0.019  (0.01) | 0.13 | - 0.22  (0.40) | 0.56 | - 2.33  (1.12) | 0.04** | - 15.89  (8.04) | 0.04** | 0.04  (0.02) | 0.07 | 0.37  (0.18) | 0.04** | 3.19  (1.48) | | 0.03** | - 0.07  (0.03) | | 0.03** |
| ***Negative Urgency*** | 9.81  (4.94) | 0.04** | - 0.96  (0.49) | 0.04** | 0.019  (0.01) | 0.13 | - 0.17  (0.41) | 0.67 | - 2.41  (0.92) | 0.01** | - 11.43  (6.21) | 0.06 | 0.21  (0.09) | 0.02** | 1.17  (0.58) | 0.04** | 2.31  (1.16) | 0.04** | | - 0.22  (0.11) | | 0.03** |
| ***Lack of Perseverance*** | 8.75  (4.67) | 0.06 | - 1.0  (0.57) | 0.08 | 0.012  (0.01) | 0.32 | - 0.28  (0.40) | 0.48 | - 1.54  (0.79) | 0.05 | - 11.04  (5.39) | 0.34 | 0.15  (0.09) | 0.12 | 1.53  (0.68) | 0.02** | 2.15  (0.97) | 0.03** | | - 0.27  (0.12) | | 0.03** |
| ***Lack of Premeditation*** | 4.05  (4.63) | 0.38 | - 0.38  (0.54) | 0.47 | 0.014  (0.01) | 0.23 | - 0.13  (0.39) | 0.73 | - 0.89  (0.85) | 0.29 | - 1.78  (5.58) | 0.74 | 0.06  (0.09) | 0.51 | 0.25  (0.63) | 0.68 | 0.37  (1.05) | 0.72 | | - 0.0  (0.12) | | 0.75 |
| ***Sensation Seeking*** | - 1.94  (3.46) | 0.57 | 0.27  (0.33) | 0.40 | 0.013  (0.01) | 0.28 | - 0.09  (0.40) | 0.82 | 0.08  (0.60) | 0.88 | 0.35  (4.24) | 0.93 | - 0.04  (0.06) | 0.45 | 0.001  (0.41) | 0.99 | 0.16  (0.76) | 0.83 | | - 0.01  (0.07) | | 0.88 |
| ***Positive Urgency*** | 2.11  (2.84) | 0.45 | -0.22  (0.41) | 0.59 | 0.017  (0.01) | 0.17 | - 0.14  (0.39) | 0.72 | - 0.70  (0.50) | 0.15 | - 4.74  (4.19) | 0.25 | 0.05  (0.07) | 0.45 | 0.55  (0.50) | 0.26 | 0.85  (0.75) | 0.26 | | - 0.09  (0.09) | | 0.30 |

**All Β coefficients represent unstandardized estimates, reflecting the change in log-odds per one-unit increase in the predictor.*

***Statistically significant model parameters (p<0.05)*

*1 Two-way interaction between impulsivity score and SSS*

*2 Two-way interaction between impulsivity score and Diagnosis*

*3 Two-way interaction between SSS and Diagnosis*

*4 Three-way interaction between Impulsivity score, SSS, and Diagnosis*

***SE*** *= Standard Error;* ***SSS*** *= Subjective Social Status;* ***S-UPPS-P*** *= Short UPPS-P Impulsive Behavior Scale****.***

Fig 1. Distribution of impulsivity subscale scores across suicide status groups based on presence or absence of prior suicide attempt.

Fig 2. Three-way interaction between S-UPPS-P sub-scales' score, diagnosis, and SSS.

***SSS*** *= Subjective social status:* ***S-UPPS-P*** *= Short UPPS-P Impulsive Behavior Scale.*

.

Fig 3. Association of SSS and total S-UPPS-P score.

***SSS*** *= Subjective social status;* ***S-UPPS-P*** *= Short UPPS-P Impulsive Behavior Scale*

Fig 4. Association of SSS and S-UPPS-P subscale scores stratified by presence or absence of a history of suicide attempt.

***SSS*** *= Subjective social status;* ***S-UPPS-P*** *= Short UPPS-P Impulsive Behavior Scale.*

Fig 5. Association of SSS and S-UPPS-P total score across MDD and BD groups based on presence or absence of prior suicide attempt.

***SSS*** *= Subjective Social Status;* ***S-UPPS-P*** *= Short UPPS-P Impulsive Behavior Scale****.***
